# Supplementary material for: Interfacial modulation of Ru catalysts using B, N co-doped porous carbon-confined MoC quantum dots for enhanced hydrogen evolution reaction performance
Source: Royal Society of Chemistry journal article supplement (doi:10.1039/d4ta02442g), 2024-01-01
Supplement: d4ta02442g1.pdf [file d4ta02442g1.pdf]

## *Supporting Information*

### **Interfacial modulation of Ru catalysts by B, N co-doped porous carbon-confined MoC quantum dots for enhanced hydrogen evolution reaction performance**

Shumin Xie<sup>a,1</sup>, Mang Niu<sup>a,1</sup>, Xingyun Li<sup>a,\*</sup>, Yang Lei<sup>b</sup>, Huanfang Zhang<sup>a</sup>, Shuai Xu<sup>a</sup>, Deyu Wang<sup>c</sup>, Sameh M. Osman<sup>d</sup>, Zhi Peng<sup>a</sup>, and Yusuke Yamauchi<sup>e,f,g,\*</sup>

<sup>a</sup>Institute of Materials for Energy and Environment, College of Materials Science and Engineering, Qingdao University, Qingdao 266071, China

<sup>b</sup>School of Chemistry and Chemical Engineering, Hubei Key Laboratory of Coal Conversion and New Carbon Materials, Wuhan University of Science and Technology, Wuhan 430081, China

<sup>c</sup>Key Laboratory of Optoelectronic Chemical Materials and Devices of Ministry of Education, Jiangnan University, Wuhan 430056, China

<sup>d</sup>Chemistry Department, College of Science, King Saud University, P. O. Box 2455, Riyadh 11451, Saudi Arabia

<sup>e</sup>Department of Materials Process Engineering, Graduate School of Engineering, Nagoya University, Nagoya 464-8603, Japan

<sup>f</sup>Australian Institute for Bioengineering and Nanotechnology (AIBN), The University of Queensland, Brisbane, Queensland 4072, Australia

<sup>g</sup>Department of Plant & Environmental New Resources, College of Life Sciences, Kyung Hee University, 1732 Deogyong-daero, Giheung-gu, Yongin-si, Gyeonggi-do 17104, South Korea

#### **Calculation method**

The DFT calculations were carried out using the Vienna Ab-initio Simulation Package (VASP)<sup>1,2</sup> with the frozen-core all-electron projector-augment-wave (PAW)<sup>3,4</sup> method. The Perdew-Burke-Ernzerhof (PBE)<sup>5</sup> of generalized gradient approximation (GGA) was adopted to describe the exchange and correlation potential. The cutoff energy for the plane-wave basis set was set to 450 eV. A mono-layer 8×8 graphene was used, and a vacuum region of 20 Å above it was used to ensure the decoupling between neighboring systems. N-doped graphene (NC) was simulated by inducing 2-pyrrolic N, 3-pyridinic N, and 3-graphitic N in the graphene. The Ru<sub>13</sub> and 2-layer 3×3 MoC (111) clusters were placed on the NC to built Ru/NC and MoC/NC composites, respectively. Both of Ru<sub>13</sub> and MoC cluster was placed on the NC to built Ru/MoC@NC composite, and 2-C atoms of NC were replaced by 2-B atoms was used to simulate the models of B-N-co-doped graphene (BNC). The geometry optimizations were performed until the forces on each ion was reduced below 0.01 eV/Å, and a 1×1×1 Monkhorst-Pack k-point<sup>6</sup> sampling of the Brillouin zone was used. The DFT-D3 method were used to describe the van der Waals interaction<sup>7</sup>.

The Gibbs free-energy ( $\Delta G$ ) is calculated as

$$\Delta G = E_{\text{DFT}} + \Delta E_{\text{ZPE}} - T\Delta S$$

$\Delta E_{\text{ZPE}}$  is the difference corresponding to the zero point energy between the adsorbed molecule and molecule in the gas phase and  $\Delta S$  is one molecule entropy between adsorbed state and gas phase.  $E_{\text{DFT}}$  is the total energy of DFT calculated system.

The formation energy ( $E_f$ ) of Ru<sub>13</sub> cluster on MoC@BNC substrate was calculated by the following equation:

$$E_f = E_{\text{Ru/MoC@BNC}} - E_{\text{MoC@BNC}} - E_{\text{Ru}}$$

where  $E_{\text{Ru/MoC@BNC}}$  is the total energy of Ru/MoC@BNC,  $E_{\text{MoC@BNC}}$  is the total energy of MoC@BNC substrate, and  $E_{\text{Ru}}$  is the total energy of Ru<sub>13</sub> cluster.

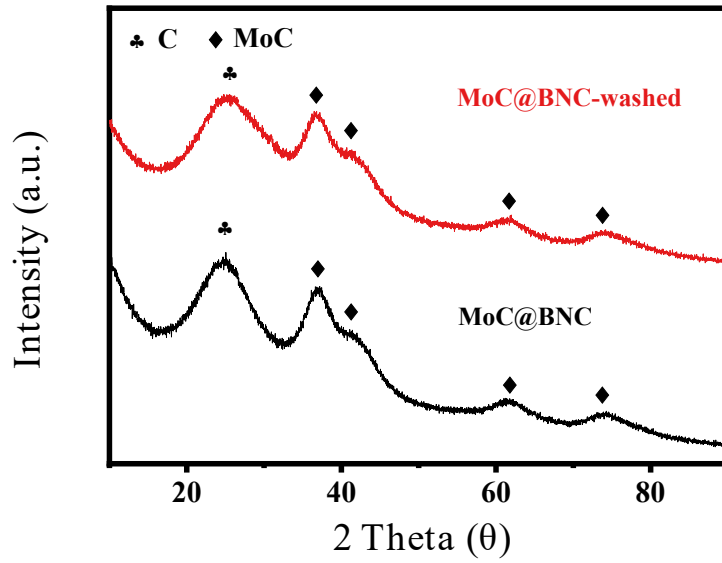

**Fig. S1** XRD patterns of MoC@BNC samples before and after methanol washing.

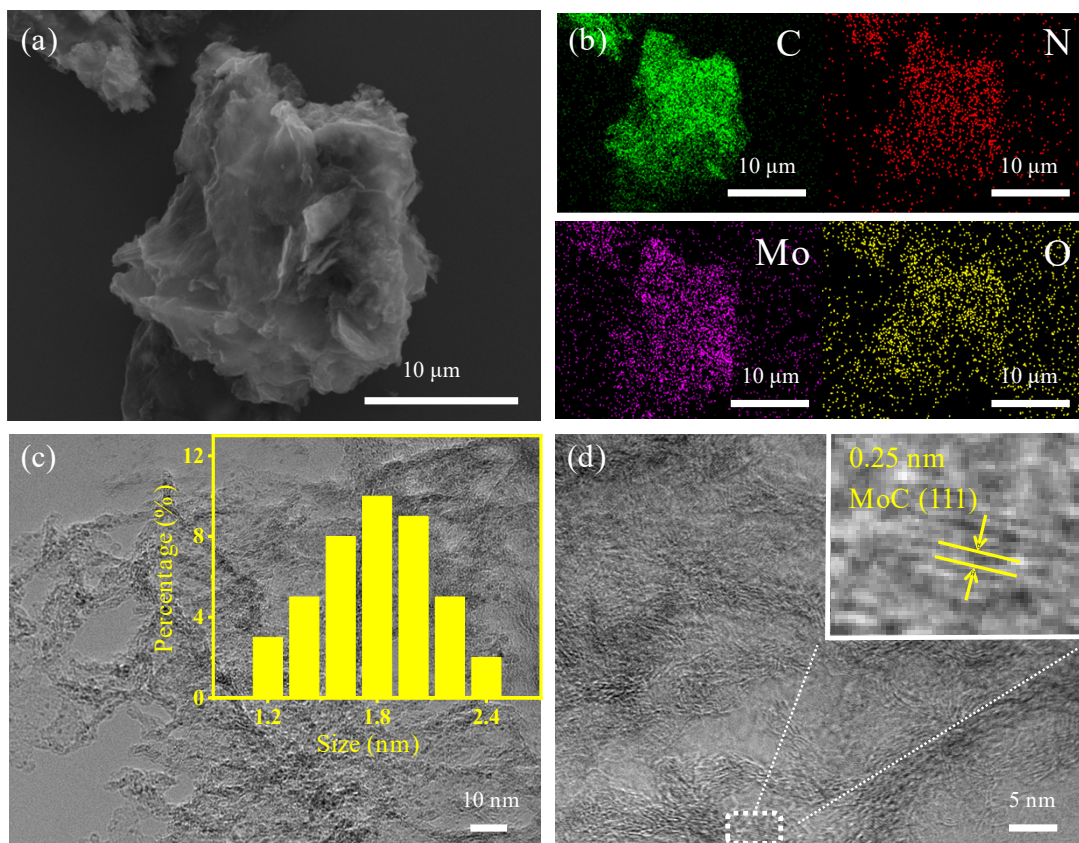

**Fig. S2** (a) SEM image, (b) EDS elemental mapping of C, N, Mo, and O, (c) TEM image (inset is the particle size distribution of MoC), and (d) HR-TEM image of MoC@BNC.

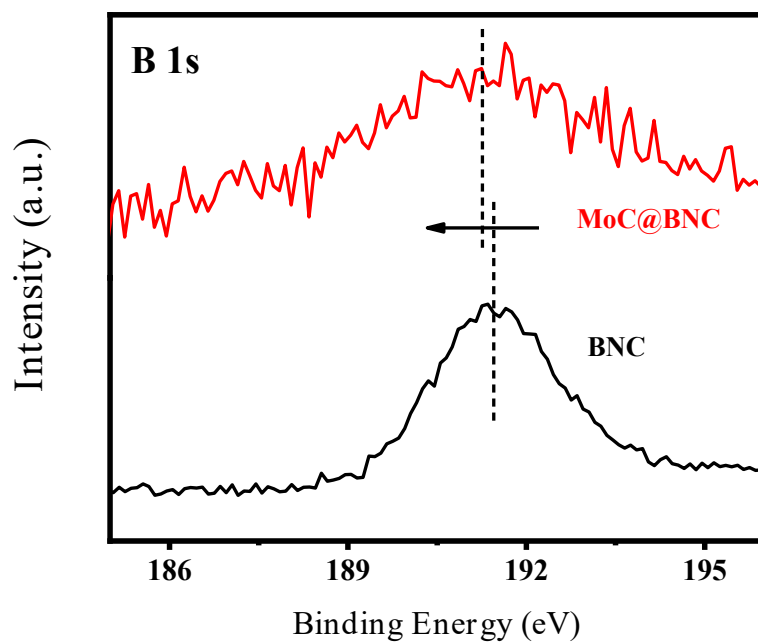

**Fig. S3** B 1s XPS spectra of MoC@BNC and BNC.

**Table S1** The loadings of Ru and Mo on various samples analyzed by ICP-OES.

| Material   | Ru (wt.%) | Mo (wt.%) |
|------------|-----------|-----------|
| Ru/MoC@BNC | 4.0       | 17.0      |

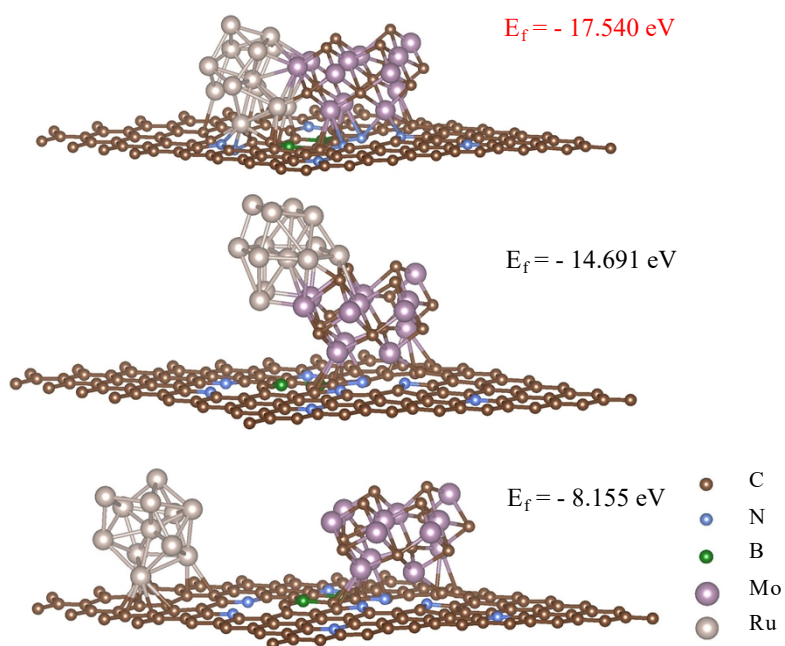

**Fig. S4** The optimized structures of  $\text{Ru}_{13}$  cluster on the surface of  $\text{MoC@BNC}$  substrate and the corresponding formation energy ( $E_f$ ).

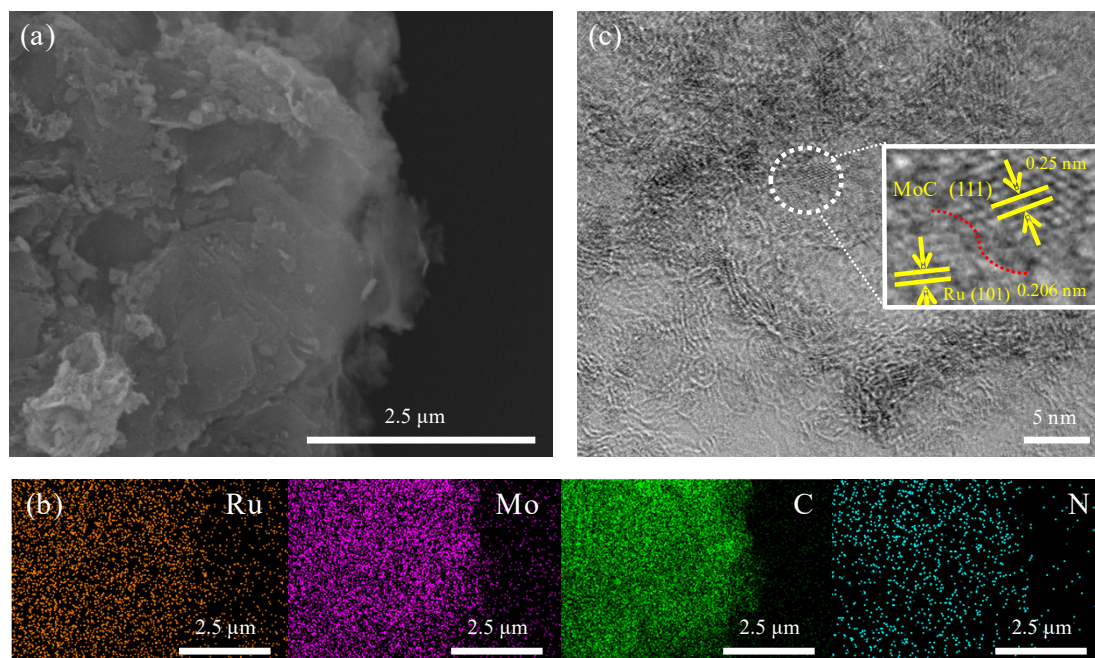

**Fig. S5** (a) SEM image, (b) EDS elemental mapping of Ru, Mo, C, and N, and (c) TEM image of  $\text{Ru/MoC@NC}$ .

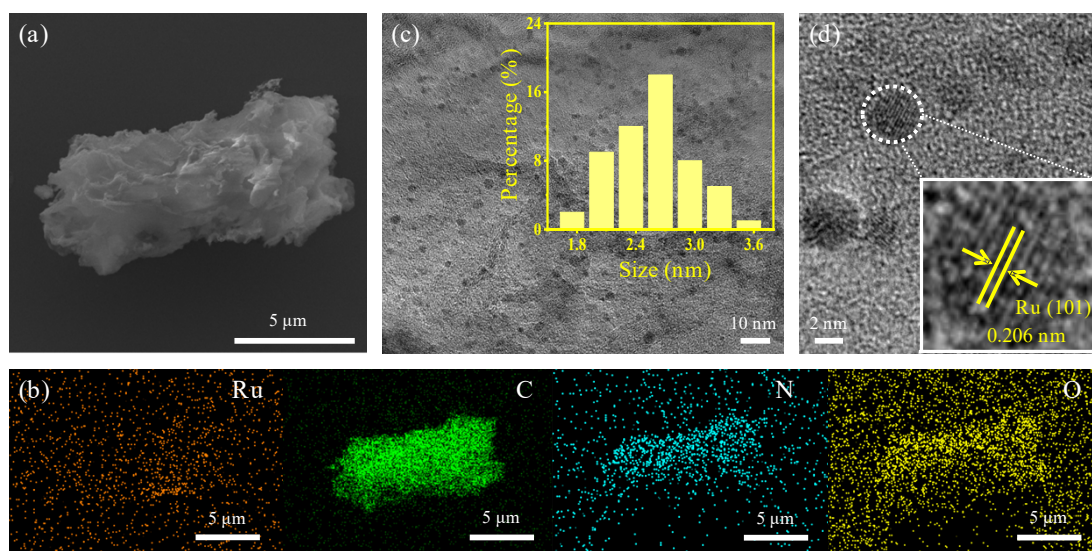

**Fig. S6** (a) SEM image, (b) EDS elemental mapping of Ru, C, N, and O, and (c-d) TEM image of Ru/NC.

**Table S2** Porosity parameters of Ru/MoC@BNC, Ru/MoC@NC, and Ru/NC obtained from N<sub>2</sub> adsorption desorption isotherms.

| Materials  | S <sub>BET</sub> (m <sup>2</sup> /g) | V <sup>a</sup> <sub>total</sub> (cc/g) |
|------------|--------------------------------------|----------------------------------------|
| Ru/MoC@BNC | 227.0                                | 1.29                                   |
| Ru/MoC@NC  | 218.3                                | 1.20                                   |
| Ru/NC      | 250.0                                | 1.11                                   |

<sup>a</sup> total pore volume at P/P<sub>0</sub>= 0.99.

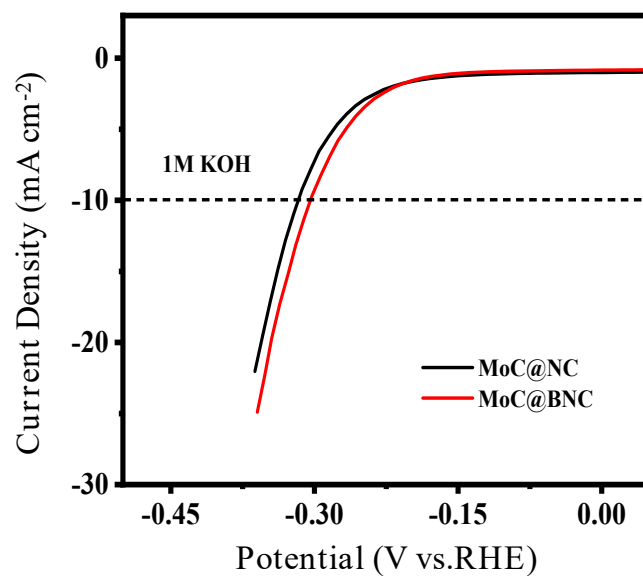

**Fig. S7** Polarization curve of MoC@BNC and MoC@NC in 1.0 M KOH electrolyte at  $5 \text{ mV s}^{-1}$ .

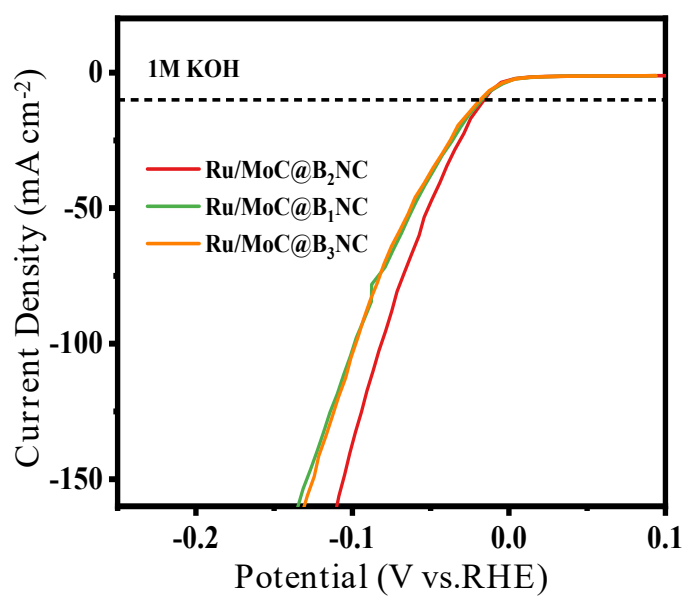

**Fig. S8** Polarization curve of Ru/MoC@BNC of different B contents in 1.0 M KOH electrolyte at  $5 \text{ mV s}^{-1}$ .



**Table S3** Comparison of  $\eta_{10}$  and tafel slope of Ru/MoC@BNC with representatively reported HER electrocatalysts.

| Catalysts                      | Overpotential at 10 mA cm <sup>-2</sup> (mV) | Ref.      |
|--------------------------------|----------------------------------------------|-----------|
| Ru/MoC@BNC                     | 14                                           | This work |
| Ru NCs/NC                      | 14                                           | 8         |
| Mo-Ru NSAs                     | 16                                           | 9         |
| TNCR-600                       | 17                                           | 10        |
| B-Ru@CNT                       | 17                                           | 11        |
| Mo <sub>2</sub> C-Ru@CNBs      | 18                                           | 12        |
| P, Mo-Ru@PC                    | 21                                           | 13        |
| RuNi/MoC@NC                    | 21                                           | 14        |
| Ru@WNO-C                       | 24                                           | 15        |
| Ru/ $\alpha$ -MoC              | 25                                           | 16        |
| Ru/NBC                         | 30                                           | 17        |
| Ru/BN@C                        | 32                                           | 18        |
| Ru-Mo <sub>2</sub> C/CN        | 34                                           | 19        |
| Mo-Ru/CNTs                     | 35                                           | 20        |
| Ru/TiN-300                     | 38                                           | 21        |
| Mo-RuCoOx                      | 41                                           | 22        |
| Ru SAs/N-Mo <sub>2</sub> C NSs | 43                                           | 23        |

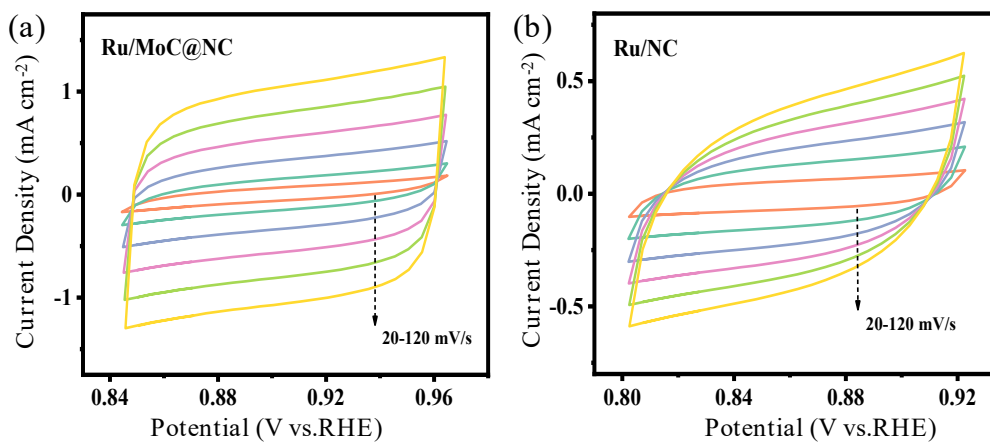

**Fig. S9** Cyclic voltammogram of Ru-based catalysts with different rates from 20 to 120 mV s<sup>-1</sup>.

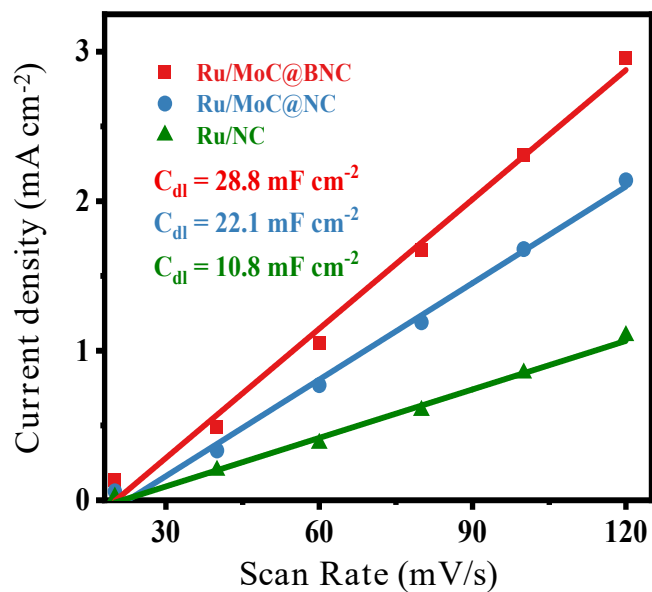

**Fig. S10** The capacitive current at 0.1 V as a function of scan rate for Ru/MoC@BNC, Ru/MoC@NC, and Ru/NC.

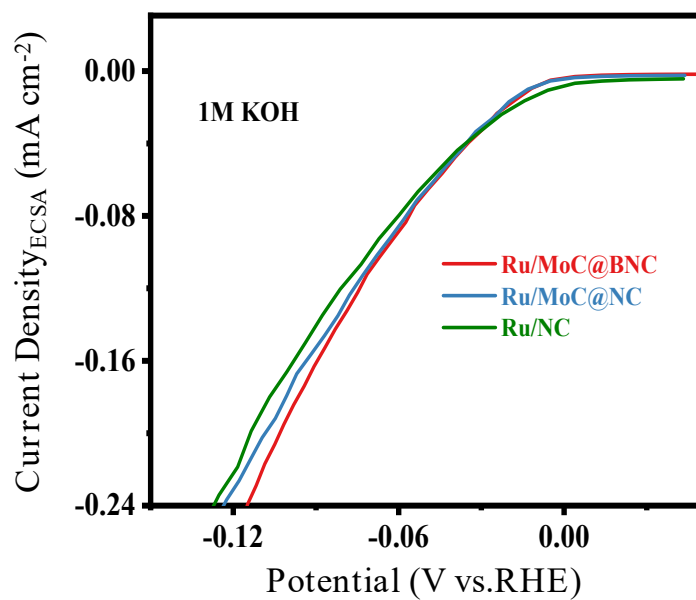

**Fig. S11** Polarization curves normalized by ECSA for the Ru/MoC@BNC, Ru/MoC@NC and Ru/NC.

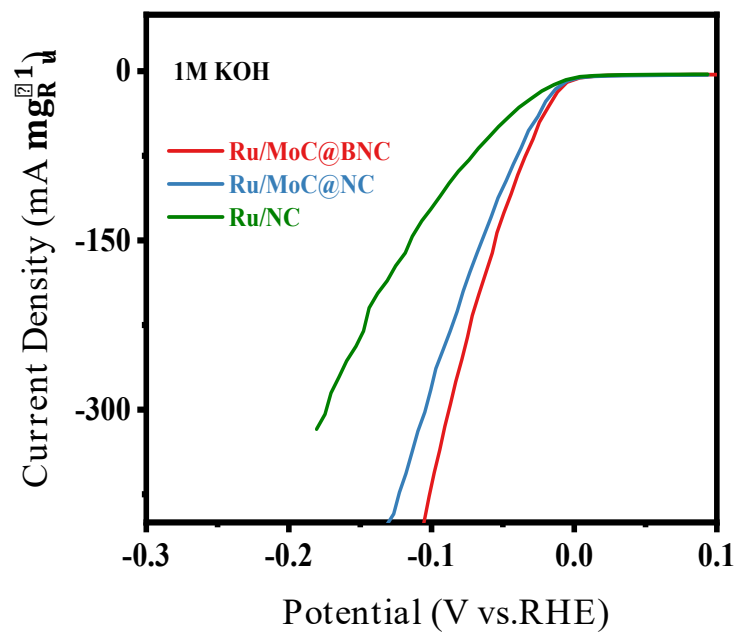

**Fig. S12** Polarization curve of Ru/MoC@BNC, Ru/MoC@NC and Ru/NC in 1.0 M KOH electrolyte at  $5 \text{ mV s}^{-1}$  (the unit of current density is  $\text{mA mg}_{\text{Ru}}^{-1}$ ).

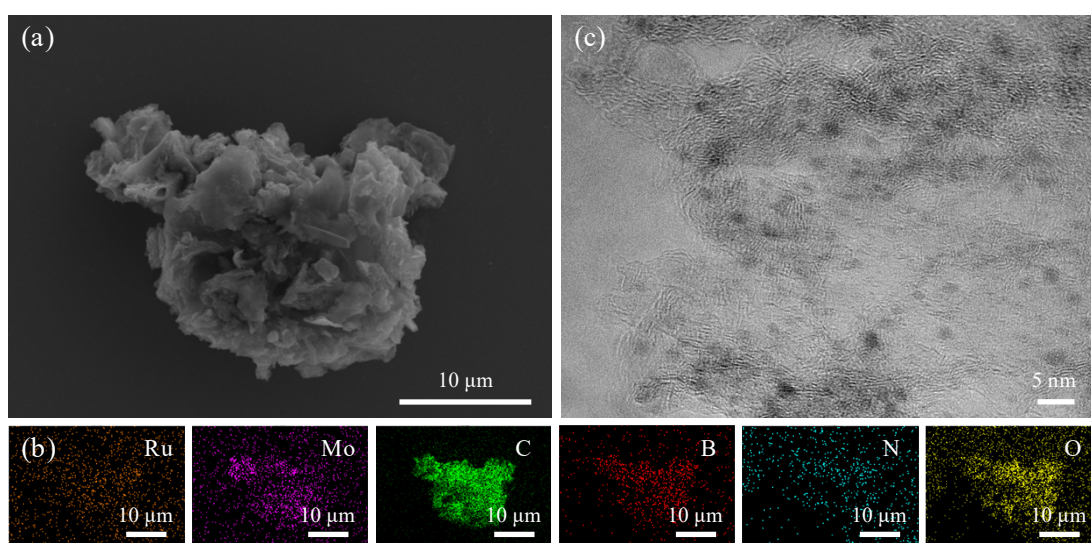

**Fig. S13** (a) SEM image, (b) Ru, Mo, C, B, N, and O EDS elemental mapping and (c) TEM image of Ru/MoC@BNC following the durability test.

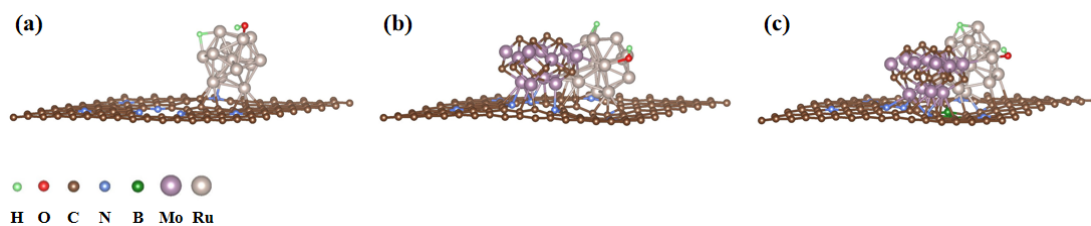

**Fig. S14** Optimized adsorption structures of  $*\text{OH}+*\text{H}$  for (a) Ru/NC, (b) Ru/MoC@NC, and (c) Ru/MoC@BNC.

## References

1. G. Kresse and J. Hafner, *Phys. Rev. B*, 1994, **49**, 14251-14269.
2. G. Kresse and J. Furthmüller, *Phys. Rev. B*, 1996, **54**, 11169-11186.
3. P. E. Blöchl, *Phys. Rev. B*, 1994, **50**, 17953-17979.
4. G. Kresse and D. Joubert, *Phys. Rev. B*, 1999, **59**, 1758-1775.
5. B. Hammer, L. B. Hansen and J. K. Norskov, *Phys. Rev. B*, 1999, **59**, 7413-7421.
6. H. J. Monkhorst and J. D. Pack, *Phys. Rev. B*, 1976, **13**, 5188-5192.
7. S. Grimme, J. Antony, S. Ehrlich and H. Krieg, *J. Chem. Phys.*, 2010, **132**, 154104.
8. X. Huang, R. Lu, Y. Cen, D. Wang, S. Jin, W. Chen, I. Geoffrey, N. Waterhouse, Z. Wang, S. Tian and X. Sun, *Nano Res.*, 2023, **16**, 9073-9080.
9. L. Li, S. Liu, C. Zhan, Y. Wen, Z. Sun, J. Han, T.-S. Chan, Q. Zhang, Z. Hu and X. Huang, *Energy Environ. Sci.*, 2023, **16**, 157-166.
10. M. Wu, X. Fan, W. Zhang, B. Chen, T. Ye, Q. Zhang, Y. Fang, Y. Wang and Y. Tang, *Chin. Chem. Lett.*, 2024, **35**, 109258.
11. X. Sun, W. Li, J. Chen, X. Yang, B. Wu, Z. Wang, B. Li and H. Zhang, *J.*

- Colloid Interface Sci.*, 2022, **616**, 338-346.
12. B. Qin, C. He, Y. Wei, L. Ji, T. Wang, Z. Chen and S. Wang, *Electrochim. Acta*, 2023, **444**, 141977.
  13. C. Li, H. Jang, S. Liu, M. G. Kim, L. Hou, X. Liu and J. Cho, *Adv. Energy Mater.*, 2022, **12**, 2200029.
  14. X. Fan, B. Li, C. Zhu, F. Yan and Y. Chen, *Nanoscale*, 2023, **15**, 16403-16412.
  15. G. Meng, H. Tian, L. Peng, Z. Ma, Y. Chen, C. Chen, Z. Chang, X. Cui and J. Shi, *Nano Energy*, 2021, **80**, 105531.
  16. X. Fan, C. Liu, M. Wu, B. Gao, L. Zheng, Y. Zhang, H. Zhang, Q. Gao, X. Cao and Y. Tang, *Appl. Catal. B: Environ.*, 2022, **318**, 121867.
  17. B. Jiang, Z. Wang, H. Zhao, X. Wang, X. Mao, A. Huang, X. Zhou, K. Yin, K. Sheng and J. Wang, *Nanoscale*, 2023, **15**, 19703-19708.
  18. A. Salah, H. D. Ren, N. Al-Ansi, H. Tan, F. Yu, L. Yanchun, B. M. Thamer, A. Al-Salihy, L. Zhao and Y. Li, *J. Colloid Interface Sci.*, 2023, **644**, 378-387.
  19. J. Chen, C. Chen, Y. Chen, H. Wang, S. Mao and Y. Wang, *J. Catal.*, 2020, **392**, 313-321.
  20. J. Sun, Z. Zhao, Z. Li, Z. Zhang, R. Zhang and X. Meng, *J. Mater. Chem. A*, 2023, **11**, 22430-22440.
  21. X. Wang, X. Yang, G. Pei, J. Yang, J. Liu, F. Zhao, F. Jin, W. Jiang, H. Ben and L. Zhang, *Carbon Energy*, 2023, **6**, e391.
  22. Y. Zhang, R. Lu, C. Wang, Y. Zhao and L. Qi, *Adv. Funct. Mater.*, 2023, **33**, 2303073.

23. J. Yu, A. Wang, W. Yu, X. Liu, X. Li, H. Liu, Y. Hu, Y. Wu and W. Zhou,  
*Appl. Catal. B: Environ.*, 2020, **277**, 119236.
